# Supplementary material for: Probing Biochemical Differences in Lipid Components of Human Cells by Means of ATR-FTIR Spectroscopy
Source: MDPI journal article supplement (doi:10.3390/biophysica3030035), 2023-09-01
Supplement: s1 [file s1]

**Table S1.** Band assignments for IR spectra of phospholipids;  $\delta$ : bending vibration;  $\delta_w$ : wagging bending;  $\delta_r$ : rocking bending;  $\nu_s$ : symmetric stretching vibration;  $\nu_{as}$ : asymmetric stretching vibration. The assignments were done in agreement with Refs. [1-5]. Bold character indicates spectrum features that are distinctive of a single phospholipid among the examined ones.

| Assignments                                                                                    | PE<br>peaks (cm <sup>-1</sup> ) | PC<br>peaks (cm <sup>-1</sup> ) | PI<br>peaks (cm <sup>-1</sup> ) | PS<br>peaks (cm <sup>-1</sup> ) |
|------------------------------------------------------------------------------------------------|---------------------------------|---------------------------------|---------------------------------|---------------------------------|
| $\nu_{as}$ (C–H), $\nu$ (O–H)                                                                  | -                               | 3419                            | 3370                            | 3442                            |
|                                                                                                | -                               | 3242                            | -                               | -                               |
| $\nu$ (H–C=)                                                                                   | 3005                            | 3010                            | 3012                            | 3010                            |
| $\nu_{as}$ (C–H <sub>3</sub> )                                                                 | -                               | -                               | 2957                            | 2959                            |
| $\nu_{as}$ (C–H <sub>2</sub> )                                                                 | 2924                            | 2924                            | 2923                            | 2923                            |
| $\nu_s$ (C–H <sub>2</sub> )                                                                    | 2854                            | 2854                            | 2853                            | 2853                            |
| $\nu$ (C=O)                                                                                    | 1740                            | 1737                            | 1733                            | 1739                            |
| $\nu$ (C= C), $\nu$ (C=O)<br>$\nu$ (C–N)                                                       | 1642                            | <b>1653</b>                     | 1646                            | 1646                            |
| $\delta$ (N–H)                                                                                 | 1541                            | -                               | -                               | <b>1523</b>                     |
| $\delta$ (C–H <sub>2</sub> ), $\delta$ (C–H <sub>3</sub> )                                     | 1465                            | 1467                            | 1467                            | 1464                            |
| $\delta$ (O–H), $\delta$ (C–H)                                                                 | -                               | -                               | -                               | <b>1417</b>                     |
| $\delta$ (C–H <sub>3</sub> )                                                                   | 1377                            | 1377                            | 1378                            | 1377                            |
| $\delta_w$ (C–H <sub>2</sub> )                                                                 | -                               | -                               | -                               | <b>1316</b>                     |
| $\nu_{as}$ ( <b>PO<sub>2</sub><sup>-</sup></b> )                                               | -                               | -                               | -                               | 1260                            |
|                                                                                                | 1226                            | <b>1234</b>                     | <b>1212</b>                     | 1222                            |
| $\nu$ (C–O), $\nu_s$ (C–C–O)                                                                   | 1175                            | 1173                            | <b>1148</b>                     | 1170                            |
| $\nu_s$ ( <b>PO<sub>2</sub><sup>-</sup></b> )                                                  | 1073                            | 1088                            | <b>1103</b>                     | -                               |
| $\nu_{as}$ (C–C–O), $\nu$ (C–O–H)                                                              | -                               | 1065                            | 1062                            | -                               |
| $\nu$ (C–O–P)                                                                                  | 1032                            | -                               | 1040                            | 1035                            |
| $\delta_r$ (C–H)                                                                               | -                               | -                               | <b>1007</b>                     | -                               |
| $\nu_{as}$ (N <sup>+</sup> (CH <sub>3</sub> ) <sub>3</sub> ), $\delta$ (C = C)                 | -                               | 971                             | <b>944</b>                      | -                               |
| $\nu_s$ (N <sup>+</sup> (CH <sub>3</sub> ) <sub>3</sub> ),<br>$\delta$ (C = C), $\delta$ (C–H) | <b>912</b>                      | 928                             | 895                             | -                               |
| $\delta$ (C– H), $\delta$ (C = C),                                                             | -                               | 875                             | 865                             | -                               |
| $\nu$ (P–O)                                                                                    | 824                             | 830                             | <b>814</b>                      | -                               |
| $\delta$ (C = C), $\delta$ (C– H),                                                             | -                               | 770                             | 760                             | 800                             |
| <b><math>\delta_r</math></b> (C–H)                                                             | 723                             | 722                             | 720                             | 721                             |

**Table S2.** Band assignments for IR spectra of sphingolipids;  $\delta$ : symmetric bending vibration;  $\delta_w$ : wagging bending;  $\delta_r$ : rocking bending;  $\nu_s$ : symmetric stretching vibration;  $\nu_{as}$ : asymmetric stretching vibration. The assignments were done in agreement with Refs. [1-5]. Bold character indicates spectrum features that are distinctive of a single sphingolipid among the examined ones.

| Assignments                                                                                    | CER<br>peaks (cm <sup>-1</sup> ) | SM<br>peaks (cm <sup>-1</sup> ) | C 1 P<br>peaks (cm <sup>-1</sup> ) | S 1 P<br>peaks (cm <sup>-1</sup> ) |
|------------------------------------------------------------------------------------------------|----------------------------------|---------------------------------|------------------------------------|------------------------------------|
| $\nu$ (O–H), $\nu$ (C–H)                                                                       | -                                | -                               | 3394                               | 3438                               |
|                                                                                                | 3292                             | 3280                            | 3294                               | -                                  |
| $\nu_{as}$ (C–H <sub>3</sub> )                                                                 | 2956                             | 2957                            | 2957                               |                                    |
| $\nu_{as}$ (C–H <sub>2</sub> )                                                                 | 2916                             | 2917                            | 2917                               | 2919                               |
| $\nu_s$ (C–H <sub>2</sub> )                                                                    | 2849                             | 2850                            | 2849                               | 2850                               |
| $\nu$ (C=O) (AMIDE I)                                                                          | 1636                             | 1642                            | 1645                               | 1636                               |
| $\delta$ (N–H) (AMIDE II)                                                                      | 1548                             | 1549                            | 1550                               | 1544                               |
| $\delta$ (C–H <sub>2</sub> ), $\delta$ (C–H <sub>3</sub> )                                     | 1467                             | 1468                            | 1467                               | 1464                               |
| $\delta$ (O–H)                                                                                 | -                                | -                               | <b>1402</b>                        | <b>1411</b>                        |
| $\delta$ (C–H <sub>2</sub> ), $\delta$ (C–H <sub>3</sub> )                                     | 1378                             | 1378                            | 1377                               | <b>1340</b>                        |
| $\nu$ (C–N)                                                                                    | <b>1283</b>                      | -                               | <b>1291</b>                        | -                                  |
| $\nu_{as}$ ( $PO_2^-$ )                                                                        |                                  | <b>1225</b>                     | 1261                               | <b>1253</b>                        |
| $\nu$ (C–O), $\nu_s$ (C–C–O)                                                                   | 1147                             | 1137                            | -                                  | <b>1189</b>                        |
|                                                                                                | 1131                             |                                 |                                    |                                    |
| $\nu_s$ ( $PO_2^-$ )                                                                           | 1094                             | 1087                            | 1087                               | 1092                               |
| $\nu_{as}$ (C–C–O), $\nu$ (C–O–H)<br>$\nu$ (C–O–P–O–C)                                         | 1068                             | 1059                            | -                                  | 1068                               |
| $\nu$ (C–O–P), $\nu$ (C–O)                                                                     | 1038                             | -                               | <b>1018</b>                        | 1035                               |
| $\nu$ (C–O)                                                                                    | -                                | -                               | <b>997</b>                         | -                                  |
| $\nu_{as}$ (N <sup>+</sup> (CH <sub>3</sub> ) <sub>3</sub> ), $\delta$ (C=C)                   | 972                              | 968                             | 963                                | 966                                |
| $\nu_s$ (N <sup>+</sup> (CH <sub>3</sub> ) <sub>3</sub> ),<br>$\delta$ (C = C), $\delta$ (C–H) | 925                              | 922                             | -                                  | 929                                |
| $\delta$ (C–H), $\delta$ (C=C),                                                                | 898                              | 875                             | 866                                | 864                                |
|                                                                                                | -                                | -                               | -                                  | 848                                |
|                                                                                                | -                                | 835                             | -                                  | 834                                |
|                                                                                                | -                                | -                               | 801                                | 803                                |
|                                                                                                | -                                | -                               | -                                  | 776                                |
|                                                                                                | -                                | 762                             | -                                  | 755                                |
| $\delta_r$ (C–H)                                                                               | 721                              | 721                             | 721                                | 721                                |

**Table S3.** Band assignments for IR spectrum of cholesterol;  $\delta$ : symmetric bending vibration;  $\nu_s$ : symmetric stretching vibration;  $\nu_{as}$ : asymmetric stretching vibration,  $\delta_w$ : wagging bending. The assignments were done in agreement with [1-6].

| Assignments                                                   | Cholesterol peaks (cm <sup>-1</sup> ) |
|---------------------------------------------------------------|---------------------------------------|
| $\nu(\text{O-H}), \nu(\text{C-H})$                            | 3038                                  |
| $\nu_{as}(\text{C-H}_2), \nu_{as}(\text{C-H}_3)$              | 2933                                  |
| $\nu_s(\text{C-H}_2)$                                         | 2902                                  |
|                                                               | 2867                                  |
| $\nu_s(\text{C-H}_2), \nu_s(\text{C-H}_3)$                    | 2850                                  |
| $\nu_s(\text{C=C}), \nu_s(\text{C=O})$                        | 1674                                  |
| $\nu\delta(\text{C-H}_2), \delta(\text{C-H}_3)$               | 1464                                  |
|                                                               | 1378                                  |
|                                                               | 1365                                  |
| $\delta(\text{C-H}_2)$                                        | 1331                                  |
|                                                               | 1218                                  |
| $\nu_s(\text{C-C})$                                           | 1191                                  |
| $\delta(\text{C-H})$ ring deformation<br>$\delta(\text{C-H})$ | 1131                                  |
|                                                               | 1108                                  |
|                                                               | 1055                                  |
| $\delta(\text{C-H})$ in plane                                 | 1022                                  |
| $\delta(\text{=C-H})$                                         | 985                                   |
| $\delta(\text{=C-H}), \delta_w(\text{C-H}_2)$                 | 956                                   |
| $\delta(\text{=C-H})$                                         | 927                                   |
| $\delta(\text{C-H}) \delta(\text{C=C})$                       | 885                                   |
| $\nu(\text{C-C-C})$                                           | 840                                   |
| $\delta(\text{C-H}) \delta(\text{C=C})$                       | 800                                   |
|                                                               | 759                                   |

**Table S4.** Band assignments for IR spectra of triolein  $\delta$ : symmetric bending vibration;  $\nu_s$ : symmetric stretching vibration;  $\nu_{as}$ : asymmetric stretching vibration,  $\delta_r$ : rocking bending,  $\delta_{sc}$ : scissoring vibration. The assignments were done in agreement with [1,2,4,5,7].

| Assignments                       | Triolein peaks (cm <sup>-1</sup> ) |
|-----------------------------------|------------------------------------|
| $\nu$ (H–C=)                      | 3005                               |
| $\nu_{as}$ (C–H <sub>2</sub> )    | 2923                               |
| $\nu_s$ (C–H <sub>2</sub> )       | 2854                               |
| $\nu_s$ (C=O)                     | 1745                               |
| $\delta_{sc}$ (C–H <sub>2</sub> ) | 1464                               |
| $\delta$ (C–H <sub>3</sub> )      | 1378                               |
| $\nu$ (C–C)                       | 1239                               |
| $\nu$ (C=C–C–O)                   | 1162                               |
|                                   | 1119                               |
|                                   | 1095                               |
| $\delta_r$ (C–H <sub>2</sub> )    | 724                                |

## References

1. Fringeli, U.P.; Gunthard, H.H. Infrared membrane spectroscopy. *Mol. Biol. Biochem. Biophys.* **1981**, *31*, 270-332, doi:10.1007/978-3-642-81537-9\_6.
2. Tamm, L.K.; Tatulian, S.A. Infrared spectroscopy of proteins and peptides in lipid bilayers. *Q. Rev. Biophys.* **1997**, *30*, 365-429, doi:10.1017/s0033583597003375.
3. Dreissig, I.; Machill, S.; Salzer, R.; Krafft, C. Quantification of brain lipids by FTIR spectroscopy and partial least squares regression. *Spectrochim. Acta A Mol. Biomol. Spectrosc.* **2009**, *71*, 2069-2075.
4. Movasaghi, Z.; Rehman, S.; ur Rehman, D.I. Fourier transform infrared (FTIR) spectroscopy of biological tissues. *Appl. Spectrosc. Rev.* **2008**, *43*, 134-179.
5. Faramarzi, B.; Moggio, M.; Diano, N.; Portaccio, M.; Lepore, M. A Brief Review of FT-IR Spectroscopy Studies of Sphingolipids in Human Cells. *Biophysica* **2023**, *3*, 158-180.
6. Gupta, U.; Singh, V.K.; Kumar, V.; Khajuria, Y. Spectroscopic studies of cholesterol: fourier transform infra-red and vibrational frequency analysis. *Materials focus* **2014**, *3*, 211-217.
7. Albuquerque, M.; Guedes, I.; Alcantara Jr, P.; Moreira, S. Infrared absorption spectra of Buriti (*Mauritia flexuosa* L.) oil. *Vib. Spectrosc.* **2003**, *33*, 127-131.
